# Supplementary material for: A Qualitative Review of Patient Feedback for the OPAT (Outpatient Antimicrobial Therapy) Service in Bristol
Source: MDPI journal article supplement (doi:10.3390/antibiotics13050420), 2024-05-03
Supplement: s1 [file antibiotics-2782339-supplementary S2.xlsx]

## Sheet: Sheet1
numerical rating	Benefits	Benefits to f+f	how likely to recommend	Any Compliments	Improvements	Other Comments
10	continue with normal quality of life, better sleep than in hospital	able to help elderly father with everyday tasks, able to continue to speak and see f+f	extremely likely	ability to live life as normal at home	24hr support hotline in case of emergencies	excellent overall care, hope it remains in use, better than being on a ward in hospital.
10	being able to be at home to be able to recover from severe covid	less demands on family to reduction in need to travel	extremely likely	good to be at home	n/a	excellent service, capable staff
10	i was able to be at home	the family knew they were being looked after	extremely likely	the nurses	no	nurses were lovely and efficient, perfect service
10	could be in my own home, rather than in hospital, yet still get the treatment I needed	less stress for the family, gave us plenty of time to arrange of our day	extremely likely	punctual, lovely and kind, the system worked well		nurses were friendly, lovely and efficient and professional. Feel well looked after
10	being at home	f+f could still visit me	extremely likely	staff were excellent	n/a	on time and kept informed
10	able to be mobile in the home, freeing up beds in the hospital, being treated by professionals	f+f dont need to journey to the hospital	extremely likely	positive approach, made me feel confident of a good outcome	service could not be bettered	professional experience, treated me well, thanks and best wishes
10	taken the stress out of recovery, able to home early	less stress for my family, better for everyones mental health	extremely likely			treament plan explained to me 100%, absolutely A1 care no faults in this service, staff have gone above and beyond
10	attentive and excellent professional service, friendly and thoughtful	able to leave hospital early so able to be at home	extremely likely	we were kept well informed	couldnt think of any	thank you for supporting me to be with my family and friends.
10	efficient and caring staff, the system worked well	easier to be at home than having to go to hospital everyday	extremely likely	treatment plan explained to me well	everything went well so cant think of improvements	pleasant and efficient
10	able to get home a few weeks earlier	family were shown how to administer antibiotics, felt supported throughout and appreciated the daily check-in phone calls	extremely likely	helpful and supportive	none come to mind	the phone check-ins were helpful
10		being able to stay out of hospital	extremely likely		please call to say if the team are delayed	lovely team, very caring and efficient
10	receive essential treatment in my own home, concentrate on relaxing and recovering, also less travelling	cuts down on travelling and able to visit at home with less hassle	extremely likely	nurses always rang me in advance of arriving, extremely efficient and answered all my questions	equipment was occasionally not available	would like the service to be expanded.
10	being at home was a huge benefit	makes everything easier for family	extremely likely	felt very well supported by nurses	nothing i can think of	very impressive thank you
10	being home with the children, being able to spend time with them as normal whilst getting treatment was great		extremely likely	really great communication, friendly and helpful	make it available for more people, a greater distance and increase number of times you can visit.
8	able to manage treatment at home		likely	felt well supported and treatment plan explained to me		keep up the good work
10	pleased to be in home environment	better for my partner as no hospital visits	extremely likely	arrived on time and always phoned ahead,	better route planning across Bristol to save time/petrol and environment	clear and concise information given, excellent service
10	helpful to my needs	husband was more relaxed about my illness	likely	kind and caring		explained my treatment plan and felt supported
10	good to be at home to help recover from covid	being at home and my family being able to engage with the nurses and other staff	extremely likely	excellent service keep it up		friendly and assuring, punctual
7	being able to be at home was really good		extremely likely		nurses flustered and in a rush, nurse cam early on 2 occasions	treatment plan was explained to me and had appropriate support
10	convenient to be treated at home, felt very supported at all times	less trips to the hospital	extremely likely	very efficient and straight forward, treatment plan was clearly explained before start of treatment	cannot think of any improvements
10	hospital stay cut short, able to have treatment from comfort of my own home, felt more relaxed	able to be close to my family	extremely likely	very well explained and supported me throughout	nothing	excellent care and guidance through a stressful situation and made me feel at ease
10	came home early		extremely likely	cheerful, polite and helpful nursing staff		explaine procedures very well
10	more freedom to move around	family were still able to continue working	extremely likely	felt more at ease and not so clinical
10	able to carry on with my life		extremely likely	first class service		on time, pleasant and professional
10	i was able to come home	great benefit of being at home	extremely likely
10	without this service I wouldnt have been able to come home	help and attention of nurses were beneficial to us at home	extremely likely	very helpful	none	extremely thankful for the wonderful service
10	able to go home, without the service I would have had 5 days in hospital	was able to have friends and family visit me	extremely likely	relaxed and calm, felt full at ease	none - appears to be working quite well	valuable service for the community
10	home care was the best	great so no hospital visits	likely	very helpful		everything explained before hand
10	able to be at home with my wife	no need for travel to hospital	extremely likely	knowledgeable, friendly, professional	unable to think of any improvements	keep up the good work and many thanks
10	saved me from being in hospital and being woken up in the middle of the night	saved daily trips	extremely likely	nurses were cheerful and did there best to put us at ease	unable to think of any improvements	nurses felt experienced and put me at ease
4	i didnt have to go to hospital		neither likely or unlikely		poor communication between specialist and OPAT team as abx course were cut short as the urine culture was negative. Patient felt uncared for
10	not having to stay in BHI and able to participate in family life	saved travel and having to take clothes and food into hospital	extremely likely	professional, approachable, came on time	arrange for nursing name tags to be attached the correct way	would always answer any queries
10	allowed to be in a familiar environment	whole family able to visit, also reduced journey times and more relaxation	extremely likely	I had a speedier recovery because of it, gives me more confidence	nothing	felt comfortable and supported every step of the way
10	loved being at home and not being in hospital	not having to visit	extremely likely	felt good not taking up a bed		everyone looked happy and enjoyed their job
9	being at home and thenurses were always on time	I was able to be home for xmas	extremely likely	nurses were on time and were extremely competent	nothing	thankyou
10	able to have infection treated at home	husband could help me at home	extremely likely	lovely, kind and caring	nothing	thank you
10			extremely likely
10	a week less in hospital		extremely likely	loved the elastomeric pump	nothing	delightful people and professional in every way
8	could be at home with family	convenience for family	extremely likely		hopefully get more staff to expand the service
10	hospital is very uncomfortable, happy to be at home	better for the family especially as they were so worried	extremely likely	pleasant, informative, caring	expand the service and see if they can review me for longer	service was brilliant thank you
10	being at home was convenient		extremely likely	everything was good		thank you
10	professional and felt supported	improved faster in home environment	extremely likely	couldnt be improved	nothing	nurses were so good and kind
10	friendly and i was worried before but they alleviated my concerns	could visit at home	extremely likely		nothing	lovely ladies, great team
10	very good service and great to have treatment at home	not having to visit daily	extremely likely	all very good, calling up ahead and checking in was nice	nothing	great service, thank you
10	very caring staff	good visiting times	extremely likely	great care from the nurses	sack the government	wanted to take the nurses for take away but werent allowed
5	no explanation of the plan to me, lack of communication	no	unlikely		better communication between professionals	there was no mental health support
10	whole team are so friendly and caring, better for my mental health		extremely likely	friendly and caring	unable to discuss issues directly with the consultant, would be nice if the consultants could call
10	came home early from hospital		extremely likely	all nurses were polite and they did abx and bloods		nurses were polite cheerful
10	helpful to have IV abx at home	able to be home for my son's 6 th birthday, hugely beneficial as I have 2 young children	extremely likely	everyone informative and friendly
10	enjoy better sleep, comfort of home, reassured by daily checks, good to be checked up on	no travelling to hospital	extremely likely	i was able to heal faster	24 hr hot line for information	such a great service, i would be happy to advocate for you to get more funding
10	stay at home, kind and caring staff	good to not take up a hospital bed	extremely likely	better than the treatment on the ward		thank you for your care
10	enabled me to go home and not be in hospital	my partner felt it was helpful to not interrupt family activities	extremely likely	clear, supportive staff, friendly		thank you, excellent service
9	not having to travel	family able to go about their own business	extremely likely	less stress		very helpful
10	saved me taking up a hospital bed	means family didnt miss me as i was home	extremely likely	very professional manner	nothing, 100% already	caring and friendly
5			likely			helpful, friendly staff
10	very kind and i was less tearful at home	family could be with me if they wanted	extremely likely	nice relaxing at home		always keen to have this service
10	dont have to go into hospital	i have 4 kids at home so very helpful	extremely likely	kind caring professional		thank you for fitting me in quickly
10	out of hospital and so got me better recovery at home	could see our children	extremely likely	good communication/flexibility	a follow up visit would be good	fantastic service needs to be expanded
10	allowed me to go home and enabled me to have ivs, so much more comfortable	less travel for family members	extremely likely	i was able to get on my life again, explained everything		thanks to all involved
10	could stay at home, not take up a hospital bed, better for my mental health	not tied to visiting times	extremely likely	i was really informed and staff very kind and friendly		thank you for your care
10	saved me stayin in hospital, bed could be used for someone else	family can see me any time	extremely likely	caring friendly professional		all staff excellent
10	not having to stay in hospital,	husband able to rest at home	extremely likely	care was exemplary, great communication, great explanationon how to connect the iv		full marks, team wonderful
10	best rest at home	families mind at rest	extremely likely	extremely kind and considerate		what a wonderful service
10	treated in the comfort of my own home, relaxed and better environment	less time pressure for hospital visits	extremely likely		a discharge letter would be helpful	thank you for keeping me at home
5	needs better coordination, but good to be out of hospital		extremely likely	professional handover to glos hospital	the number of agencies involved was confusing, staff a bit chaotic, poor communication amongst staff, 2 nurses turned up at the same time	all individuals are very nice
10			extremely likely
10	made me feel better		likely	professional	no	very helpful
10	being at home helped me get better, quality and assurance, great having a familiar team	beneficial to the whole family	extremely likely	professionally delivered	recruit more nurses into the team to expand the service	trusting the people that came into my home
9	not having to be in hospital	beneficial not having to travel	extremely likely	friendly calm and patient	no, keep it up	friendliness and helpfulness
8	yes	n/a	likely	short wait time
10	reassurance and confidence	felt assured to have him checked up on everyday	extremely likely	gave me reassurance and confidence	n/a	huge thankyou
10	being at home, saved me 6 weeks in hospital	my husband didnt have to travel	extremely likely	kind courteous	n/a
10	reassurance	home and less travel	extremely likely	lovely ladies		well done
10	comfort of own home and being able to discuss health needs with nurses	less impact on family	extremely likely	good communication with the pharmacy		able to discuss my health needs with the nurse
10	being treated at home	not having stress of parking in the hospital	extremely likely	great communication, friendly	faultless	thank you
10		less distance to travel	extremely likely	very caring and attentive	please explain medical jargon in your letters, had to travel to clevedon over holiday period
10	avoided being hospitalised, reassurance provided and everything was relaxing	less time visiting in hospital and less travel	extremely likely	friendly and reassuring	n/a	staff are wonderful, feel at ease
10	reassuring, supportive, knowledgeable	thanks for the training on how to deliver IV, also really good for us we werent allowed to visit so helpful	extremely likely	friendly and everything explained well	confusing who was leading the antibiotic decisions
9	made me feel at ease	not having to travel	likely	staff good at what they did	could staff deal with all medical conditions and not just the abx	thank you for excellent service
10	more comfort at home, not taking up hospital bed	partner not having to travel	extremely likely	able to carry on with family life		thanks to all involved
10	professional and personable	see my children	extremely likely	great communication and flexibility	expand the service out to large area
10	allowed me to go home and give up hospital bed		extremely likely	cared about what they did	n/a	great service
10	staff were amazing, really beneficial to me	being out of hospital means less travel, my wife having treatment for cancer so was helpful	extremely likely	excellent service	more phone contacts	thank you
10	great communication, kept me well informed	able to see my 3 children	extremely likely	so helpful		thank you for excellent service
9	kept me well informed, and helped me get well	stay at my own home surroundings which eased my stress	extremely likely	easier to get better quicker	n/a
10	all the home care team very helpful	great to not stay in hospital	likely	felt well supported
10	able to be home	great having the help at home	extremely likely	very good and helpful		so thankful
10	less stress being at home	no parking problems, less travel	extremely likely	really lovely staff, helped me in time of need	faultless	thank you
10	kind considerate punctual	less distance travel	extremely likely	great care and attention	explain jargon
9	good nights sleep, better mental health	less time on travel	extremely likely	straighforward and reassuring	to start iv abx at home earlier	helpful thank you
10	could be at home and cook for myself and do shopping	able to see my son who lives in Poole	extremely likely	huge admiration for the nurses	poor communication about teams and the picc line, picc line should have been taken out a while back
10	access to my own facilities	comfort for my family	extremely likely	great to have own bed/shower		keep up the good work
